# Supplementary material for: A new layered aluminoborate [Zn(dien)2][{Al(OH)}{B5O9F}] templated by transition metal complexes
Source: Royal Society of Chemistry journal article supplement (doi:10.1039/b909693k), 2009-01-01
Supplement: b909693k.pdf [file b909693k.pdf]

## A new layered aluminoborate $[\text{Zn}(\text{dien})_2][\{\text{Al}(\text{OH})\}\{\text{B}_5\text{O}_9\text{F}\}]$ templated by transition metal complex

Jian Zhou, Shou-Tian Zheng, Mingyi Zhang, Guang-Zhen Liu and Guo-Yu Yang

Table S1. Hydrogen bonds for **1** [ $\text{\AA}$  and  $^\circ$ ].

| D-H $\cdots$ A        | d(D-H) | d(H $\cdots$ A) | d(D $\cdots$ A) | $\angle(\text{DHA})$ |
|-----------------------|--------|-----------------|-----------------|----------------------|
| O1-H1E $\cdots$ F1#1  | 0.84   | 2.13            | 2.596(9)        | 115                  |
| N1-H1A $\cdots$ F1#2  | 0.92   | 2.01            | 2.926(9)        | 176                  |
| N1-H1B $\cdots$ O7#3  | 0.92   | 2.11            | 3.017(10)       | 169                  |
| N2-H2C $\cdots$ O1#3  | 0.93   | 2.19            | 3.077(10)       | 159                  |
| N3-H3B $\cdots$ O8#4  | 0.92   | 2.17            | 3.026(9)        | 154                  |
| N3-H3A $\cdots$ O9    | 0.92   | 2.01            | 2.921(10)       | 171                  |
| N4-H4A $\cdots$ O10#4 | 0.92   | 2.28            | 3.152(9)        | 158                  |
| N4-H4A $\cdots$ O8#4  | 0.92   | 2.29            | 3.049(9)        | 140                  |
| N4-H4B $\cdots$ O3#3  | 0.92   | 2.04            | 2.952(9)        | 169                  |

Symmetry transformations used to generate equivalent atoms: (#1)  $x-1, -y+1, z-1/2$ ; (#2)  $x+1, -y+1, z+1/2$ ; (#3)  $x+1, y, z+1$ ; (#4)  $x, -y+2, z+1/2$ .

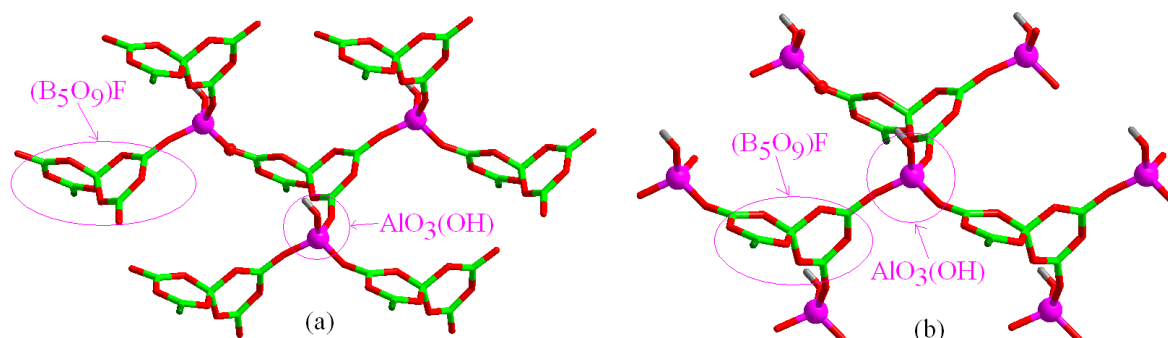

Fig. S1 View of the linkages of  $\text{B}_5\text{O}_9\text{F}$  cluster (a) and  $\text{AlO}_3(\text{OH})$  unit (b).

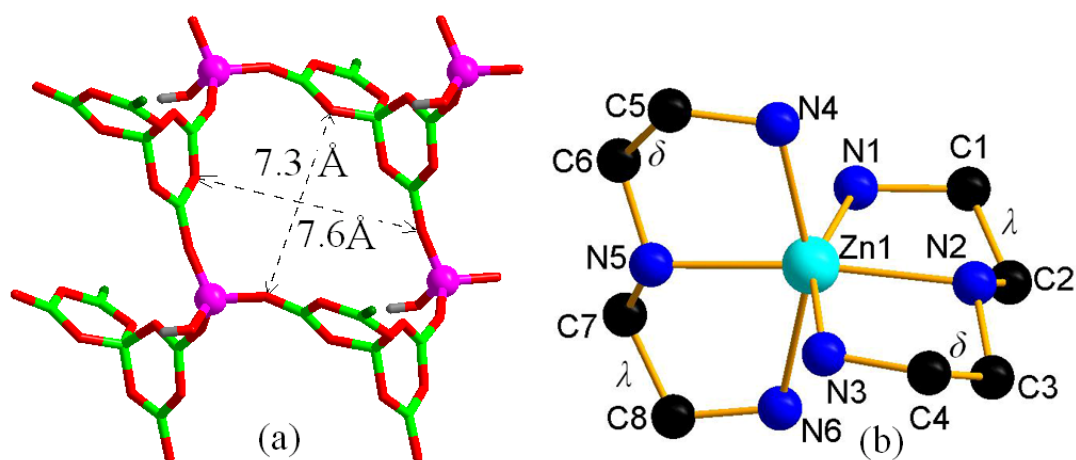

Fig. S2 (a) Elliptical 11-MR opening (H atoms of OH groups are omitted for clarity). (b) The  $\text{mer-}[\text{Zn}(\text{dien})_2]^{2+}$  cation in **1** (H atoms bonded to C and N atoms have been omitted for clarity).

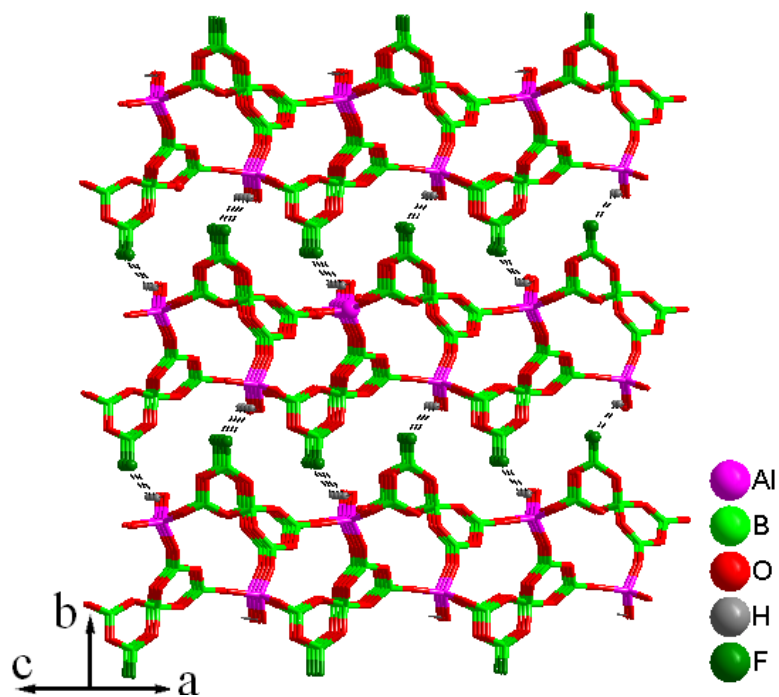

Fig. S3 Viewed along the [10-1] direction, showing parallel stacking.

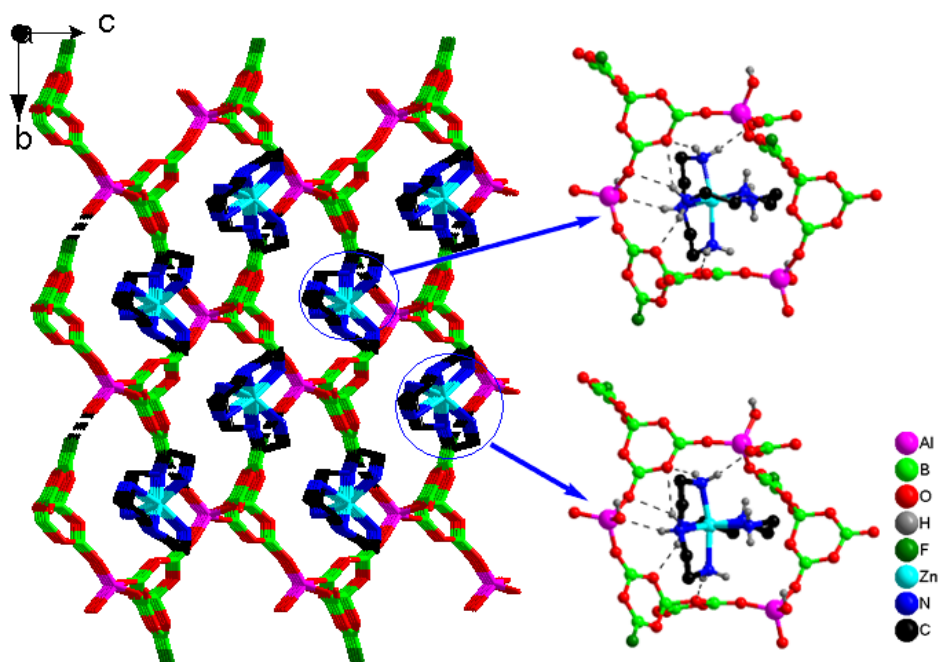

Fig. S4  $[Zn(dien)_2]^{2+}$  cations located in the channels, showing same chiral configuration.

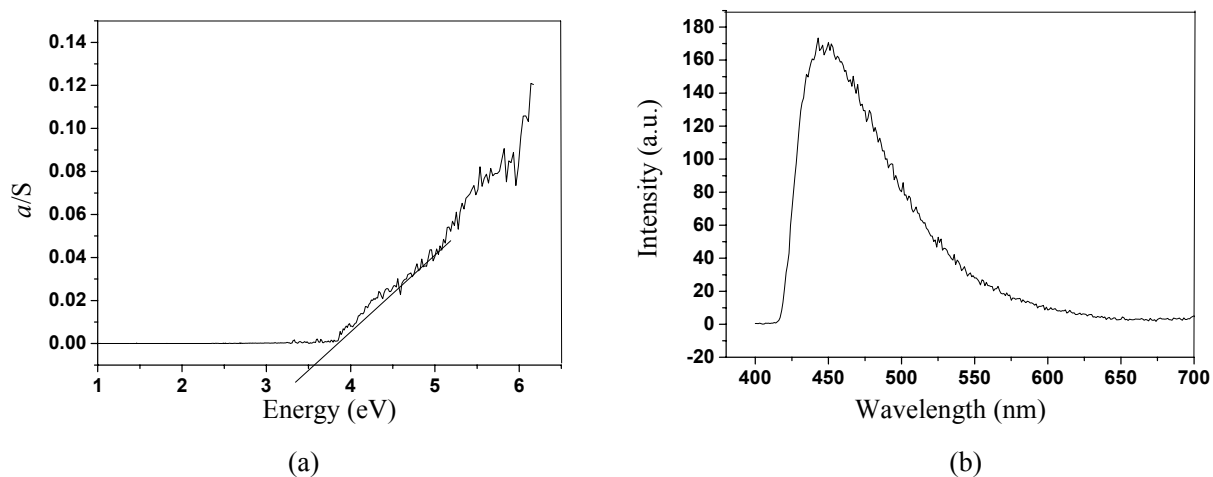

**Fig. S5** (a) UV-vis optical diffuse reflectance spectra for **1**. (b) The solid-state emission spectra of **1** at room temperature.

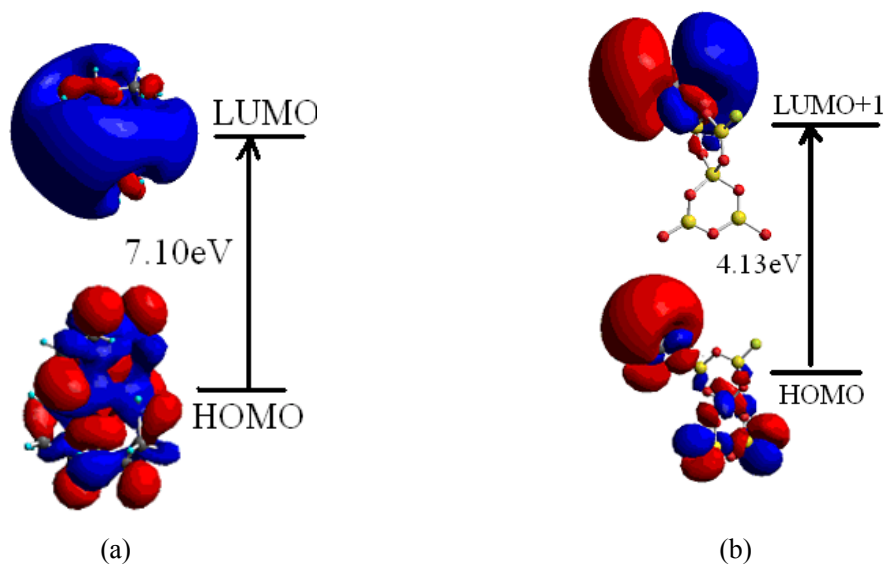

**Fig. S6** Contour plots and orbital gaps of frontier orbital for (a)  $[\text{Zn}(\text{dien})_2]^{2+}$  cation and (b)  $[\{\text{Al}(\text{OH})\}\{\text{B}_5\text{O}_9\text{F}\}]^{2-}$  species, respectively.

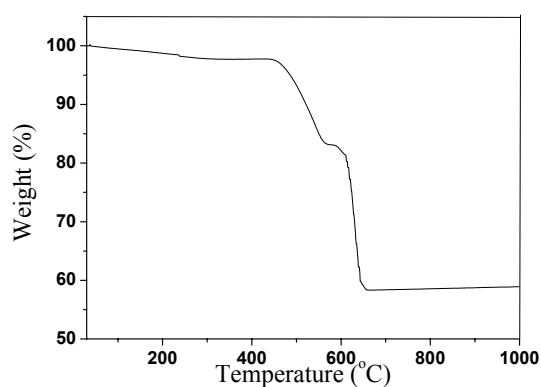

**Fig. S7** TG curve of **1**.

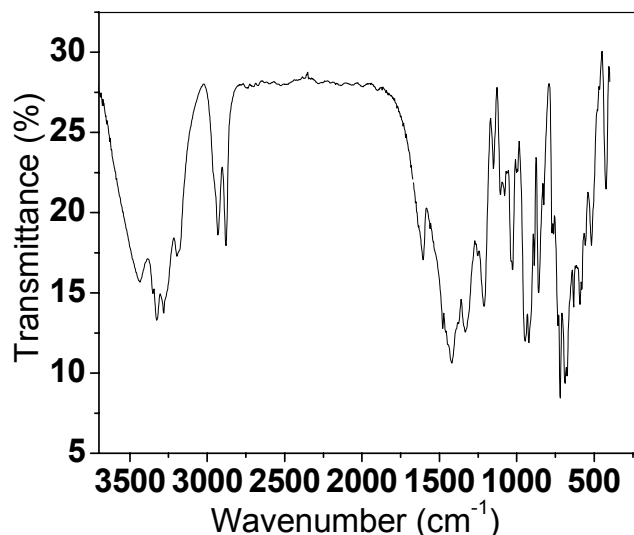

Fig. S8 IR spectrum of **1**.

The symmetric stretching vibrations of N-H are observed in the range of 3322-3185  $\text{cm}^{-1}$ . The absorption peak at 1601  $\text{cm}^{-1}$  is related to the asymmetric stretching vibrations and symmetric bond-bending vibrations of N-H and C-H bonds. The vibration absorption region of 1422-1207  $\text{cm}^{-1}$  is due to B-O bond asymmetric stretching of  $\text{BO}_3$  units, while that of  $\text{BO}_4$  units appears in the range 1145-1028  $\text{cm}^{-1}$ . The presence of an absorption peak at 852  $\text{cm}^{-1}$  originates from vibration of  $\text{AlO}_4$  units.<sup>1</sup>

1. H. S. Song, J. Zhang, J. Lin, S. J. Liu, J. J. Luo, Y. Huang, E. M. Elssfah, A. Elsanousi, X. X. Ding, J. M. Gao, and C. Tang, *J. Phys. Chem. C*, **2007**, 111, 1136.

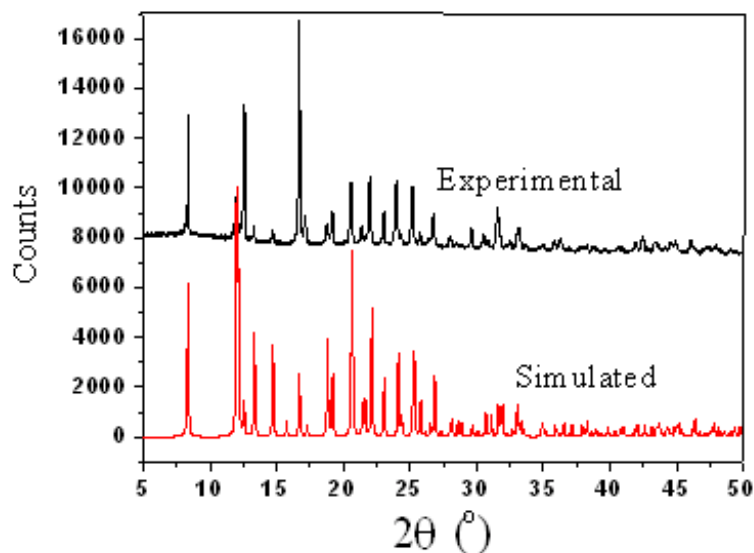

Fig. S9 Simulated and experimental powder XRD patterns of **1**.

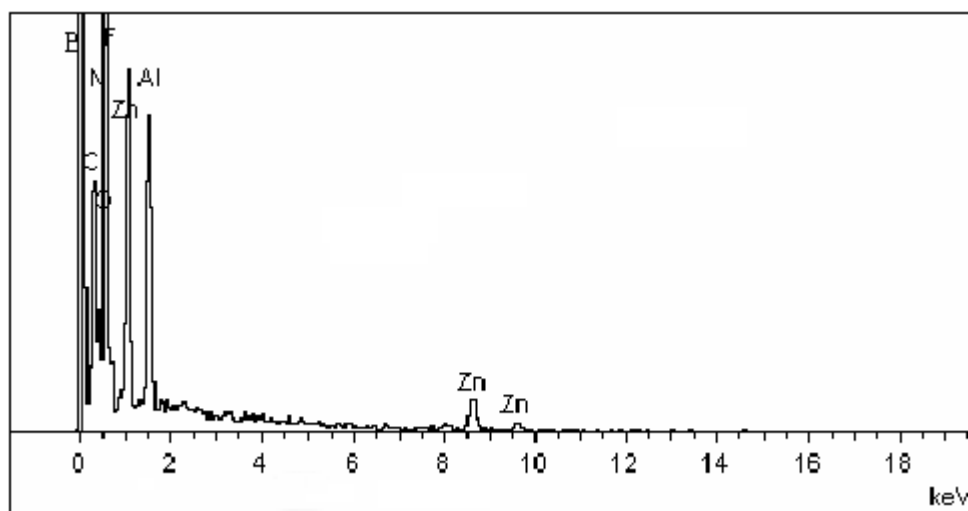

Fig. S10 EDS spectrum of **1**.
